# Supplementary material for: Bioinspired nacre-like PEEK material with superior tensile strength and impact toughness
Source: Royal Society of Chemistry journal article supplement (doi:10.1039/d2ra00667g), 2022-01-01
Supplement: d2ra00667g1.pdf [file d2ra00667g1.pdf]

[Supplementary Materials]

## Bio-inspired nacre-like PEEK material with superior tensile strength and toughness

Shu Zhu <sup>1,2\*</sup>, Tianwen Yan <sup>1,2</sup>, Mengyun Xiong <sup>1,2</sup>, Xinlin Huang <sup>1,2</sup>, Elwathig. A. M. Hassan <sup>1,2,4</sup>, Jianfeng Zhou <sup>1,2,\*</sup>, Sen Zhang <sup>1,3</sup>, Muhuo Yu <sup>1,2</sup>, Zhaomin Li <sup>5</sup>

- 1 State Key Laboratory for Modification of Chemical Fibers and Polymer Materials, Shanghai Collaborative Innovation Center of High-Performance Fibers and Composites (Province-Ministry Joint), Key Laboratory of High-Performance Fibers & Products, Ministry of Education, Center for Civil Aviation Composites, Donghua University, Shanghai, P. R. China 201620;
- 2 Key Laboratory of Shanghai City for lightweight composites, College of Materials Science and Engineering, Donghua University, Shanghai, P. R. China 201620;
- 3 Liaoning Engineering Technology Research Center of Function Fiber and Its Composites, Dalian Polytechnic University, Dalian 116034, China.
- 4 Industries Engineering and Technology, University of Gezira, Sudan;
- 5 Shanghai Microport Medical (Group) Co. Ltd., Shanghai 201203, China.

\* Correspondence: [zhushu@dhu.edu.cn](mailto:zhushu@dhu.edu.cn); [zjf@dhu.edu.cn](mailto:zjf@dhu.edu.cn)

### Relationship of processing parameters (e.g., temperatures and pressure) and compression ratios

**Table S1** Compression ratio of samples during PIF-processing as functions of temperature and pressure.

| Temperature (°C) | Pressure (MPa) | compression ratios |
|------------------|----------------|--------------------|
| 280              | 0              | 1.0                |
| 280              | 50             | 1.4                |
| 280              | 100            | 1.6                |
| 280              | 200            | 1.8                |
| 280              | 350            | 2.2                |
| 280              | 650            | 2.6                |
| 220              | 500            | 1.7                |
| 240              | 340            | 1.7                |
| 260              | 230            | 1.7                |
| 280              | 150            | 1.7                |
| 300              | 100            | 1.7                |

Table S1 shows the macroscopic compression ratio of PEEK materials formed by PIF-processing at different temperatures and pressures. In general, higher temperature or pressure leads to greater compression ratio. However, they do not follow a simple linear relation. When the pressure was rather small, increasing the pressure is very effective

to improve the compression ratio. On the other hand, in order to obtain the same compression ratio, higher pressures are required at low temperatures.

### Fracture surface morphologies after impact tests for PEEK samples

A closer look at the fracture surface morphologies can show the PIF induced nacre-like structures more clearly. Figure S1 presents the SEM images of fractured surfaces after impact tests for PEEK samples. Discontinuities could be seen between neighboring spherulites in the same layer (Figure S1c), indicating the interlocking between these deformed spherulites. The discontinuities were similar to those found in nacre (Figure 3F), but not that regular. The spherulites deformed and aligned in the pressure-induced flow direction to form parallel layers no thicker than 5  $\mu\text{m}$  and show a nice orientation of cracks perpendicular to LD, and protrusions and grooves due to the pull-out of spherulites from opposite surfaces were clearly observed along FD (Figure S1d). We speculate that the zigzag arrangement of deformed spherulites contributed to the tortuous energy dissipating paths and resulted in improved toughness, while the alignment and stretching of the amorphous regions between lamellae and spherulites are responsible for the large elongation at break.

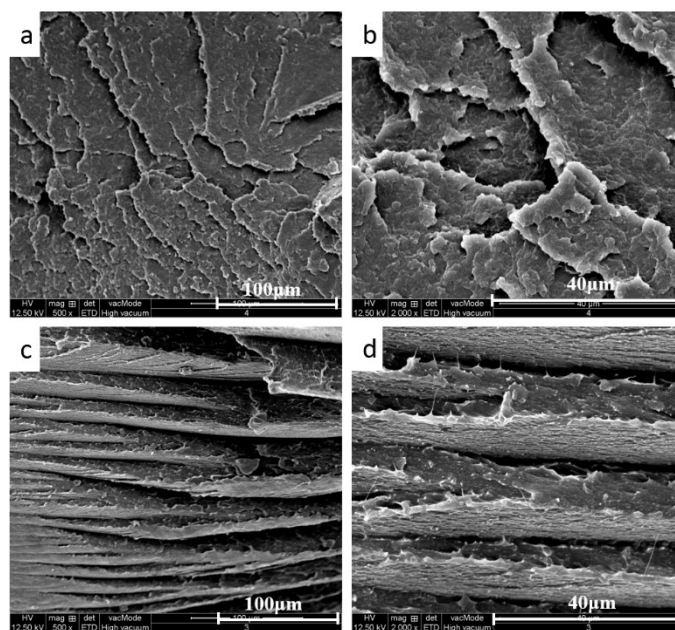

**Figure S1** SEM images of fractured surfaces after impact tests for PEEK samples: (a, b) without PIF-processing; (c, d) after PIF-processing.
